# Supplementary material for: The impact multi-decadal of changes in VOCs speciation on urban ozone chemistry: A case study in Birmingham, United Kingdom
Source: Copernicus journal article supplement (doi:10.5194/egusphere-2023-2294), 2023-10-19
Supplement: Supplementary file 1 [file egusphere-2023-2294-supplement.pdf]

*Supplement of*

The impact multi-decadal of changes in VOCs speciation on urban ozone chemistry: A case study in Birmingham, United Kingdom.

Jianghao Li<sup>1,2</sup>, Alastair C. Lewis<sup>1,3</sup>, Jim R. Hopkins<sup>1,3</sup>, Stephen J. Andrews<sup>1,3</sup>, Tim Murrells<sup>4</sup>, Neil Passant<sup>4</sup>, Ben Richmond<sup>4</sup>, Siqi Hou<sup>5</sup>, William Bloss<sup>5</sup>, Roy Harrison<sup>5,6</sup>, Zongbo Shi<sup>5</sup>.

<sup>1</sup>Wolfson Atmospheric Chemistry Laboratories, University of York, York YO10 5DD, UK

<sup>2</sup>School of Water and Environment, Chang'an University, Xi'an 710064, China

<sup>3</sup>National Centre for Atmospheric Science, University of York, Heslington, York YO10 5DD, UK

<sup>4</sup>Ricardo Energy and Environment Gemini Building, Fermi Avenue, Harwell, Oxon OX11 0QR, UK

<sup>5</sup>School of Geography, Earth and Environmental Sciences, University of Birmingham, Edgbaston, Birmingham B15 2TT, UK

<sup>6</sup>Department of Environmental Sciences, Faculty of Meteorology, Environment and Arid Land Agriculture, King Abdulaziz University, P.O. Box 80208, Jeddah 21589, Saudi Arabia

*Correspondence to:* Jianghao Li ([cfm531@york.ac.uk](mailto:cfm531@york.ac.uk))

## **Table Captions**

**Table S1.** Descriptive statistics (Mean  $\pm$  SD) of the concentrations of measured gases and meteorological parameters at the Birmingham Supersite.

**Table S2.** Relative contributions of ozone precursors emitted from the six emission inventory source sectors.

**Table S1.** Descriptive statistics (Mean  $\pm$  SD) of the concentrations of measured gases and meteorological parameters at the Birmingham Supersite.

| Species (ppbv)          | Initial Period  | O <sub>3</sub> Period | Clear-out Period |
|-------------------------|-----------------|-----------------------|------------------|
| O <sub>3</sub>          | 21.6 $\pm$ 8.5  | 31.5 $\pm$ 19.1       | 26.7 $\pm$ 10.7  |
| CO                      | 99.0 $\pm$ 57.7 | 120.4 $\pm$ 34.5      | 102.3 $\pm$ 29.9 |
| NO                      | 0.6 $\pm$ 0.6   | 0.8 $\pm$ 2.0         | 0.6 $\pm$ 1.1    |
| NO <sub>2</sub>         | 2.5 $\pm$ 3.7   | 7.6 $\pm$ 7.8         | 3.6 $\pm$ 4.1    |
| Parameter               | Initial Period  | O <sub>3</sub> Period | Clear-out Period |
| temperature (°C)        | 18.2 $\pm$ 4.1  | 20.8 $\pm$ 5.3        | 18.1 $\pm$ 2.8   |
| relatively humidity (%) | 65.5 $\pm$ 16.9 | 58.3 $\pm$ 19.1       | 75.7 $\pm$ 15.6  |
| wind speed (m/s)        | 1.7 $\pm$ 1.2   | 1.5 $\pm$ 0.9         | 1.9 $\pm$ 1.3    |

**Table S2.** Relative contributions of ozone precursors emitted from the six emission inventory source sectors.

|                             | road<br>transport | fuel<br>fugitive | agriculture | industrial<br>process | combustion | solvents | SUM    |
|-----------------------------|-------------------|------------------|-------------|-----------------------|------------|----------|--------|
| ethane                      | 6.0%              | 48.6%            | 39.1%       | 2.1%                  | 2.9%       | 0.0%     | 98.7%  |
| butanes                     | 34.9%             | 35.2%            | 0.0%        | 1.4%                  | 1.2%       | 27.0%    | 99.8%  |
| propanes                    | 82.0%             | 9.9%             | 0.0%        | 0.7%                  | 0.5%       | 6.7%     | 99.8%  |
| C <sub>&gt;=6</sub> alkanes | 39.5%             | 31.3%            | 0.0%        | 2.2%                  | 1.5%       | 22.8%    | 97.2%  |
| acetylene                   | 85.8%             | 7.6%             | –           | 2.7%                  | 0.0%       | –        | 96.2%  |
| ethene                      | 8.6%              | 86.9%            | –           | 4.5%                  | –          | –        | 100.0% |
| butenes                     | 96.1%             | 0.7%             | –           | 0.7%                  | 1.5%       | –        | 99.0%  |
| propene                     | 64.1%             | 34.1%            | –           | 1.8%                  | –          | –        | 100.0% |
| pentenes                    | 100.0%            | –                | –           | –                     | –          | –        | 100.0% |
| 1,3-butadiene               | 76.0%             | 3.3%             | –           | 3.5%                  | 11.0%      | –        | 93.8%  |
| toluene                     | 80.0%             | 3.8%             | 0.3%        | 0.6%                  | 1.1%       | 10.3%    | 96.1%  |
| xylenes                     | 72.0%             | 1.3%             | 0.3%        | 1.0%                  | 1.3%       | 21.6%    | 97.6%  |
| other<br>aromatics          | 71.3%             | 2.9%             | –           | 1.8%                  | 5.3%       | 12.6%    | 94.0%  |
| acetaldehyde                | 69.0%             | –                | 0.2%        | 13.0%                 | 0.0%       | –        | 82.1%  |
| acetone                     | 17.0%             | –                | –           | 15.4%                 | 0.2%       | 65.6%    | 98.3%  |
| methanol                    | –                 | 0.0%             | –           | 3.0%                  | –          | 96.8%    | 99.8%  |
| ethanol                     | 7.3%              | 0.1%             | 11.9%       | 48.8%                 | 5.8%       | 25.3%    | 99.1%  |
| NO <sub>x</sub>             | 33.3%             | –                | 3.9%        | 18.4%                 | 28.0%      | –        | 83.5%  |
| CO                          | 14.5%             | 1.2%             | –           | 32.3%                 | 34.0%      | –        | 82.0%  |

## Figure Captions

**Figure S1.** Average contributions of different measured VOCs functional groups to the overall measured total of VOCs and the mean concentrations of the sum of all measured VOCs in the each of the three periods.

**Figure S2.** Diurnal variations of the modelled average OH reactivity ( $k(\text{OH})$ ) for VOCs, CO, and NO<sub>x</sub> in initial period(a), O<sub>3</sub> period (b), and clear-out period (c).

**Figure S3.** Modelled average chemical budgets of O<sub>3</sub> in the selected periods.

**Figure S4.** Emissions of VOCs from anthropogenic sources in the UK between 1990-2019. Data: UK National Atmospheric Emissions Inventory (<https://naei.beis.gov.uk/>, last access 07 September 2023).

**Figure S5.** Modelled RIRs for anthropogenic sources in selected periods during 08:00-16:00 LST.

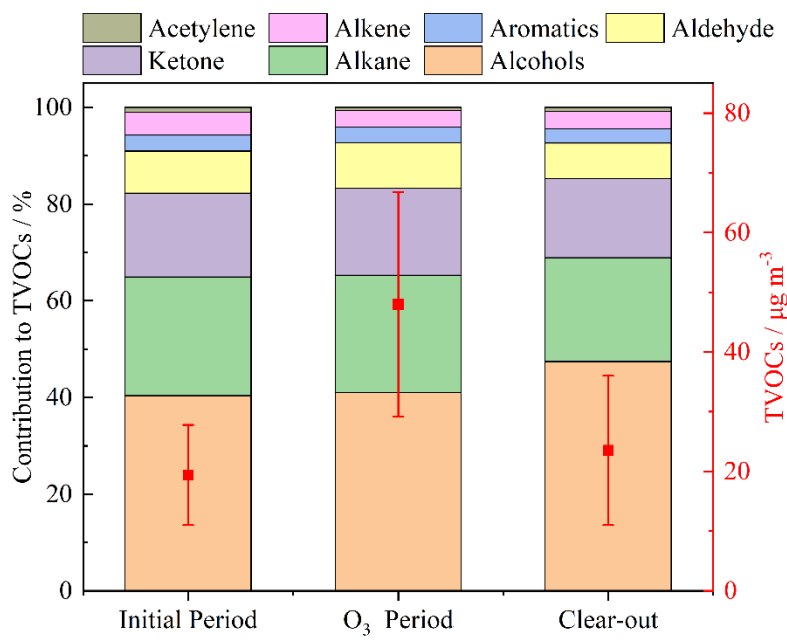

**Figure S1.** Average contributions of different measured VOCs functional groups to the overall measured total of VOCs and the mean concentrations of the sum of all measured VOCs in the each of the three periods.

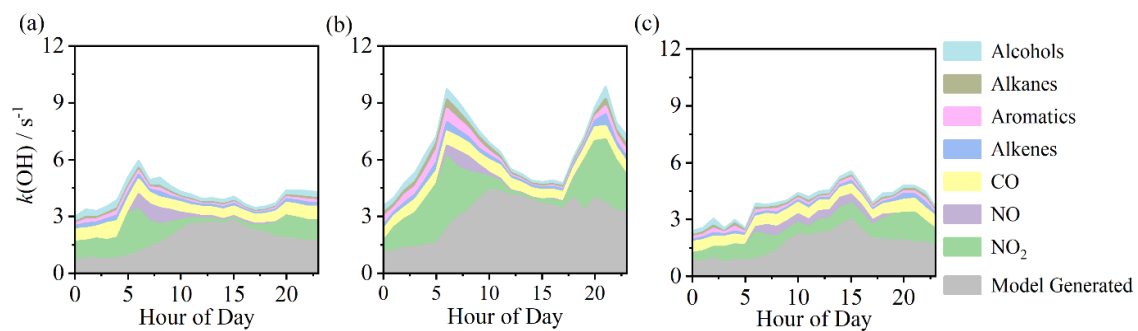

**Figure S2.** Diurnal variations of the modelled average OH reactivity ( $k(\text{OH})$ ) for VOCs, CO, and NO<sub>x</sub> in initial period(a), O<sub>3</sub> period (b), and clear-out period (c).

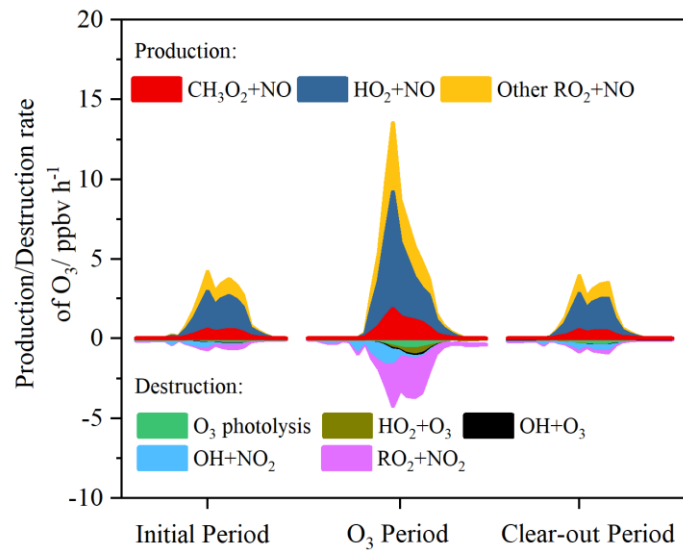

**Figure S3.** Modelled average chemical budgets of  $O_3$  in the selected periods.



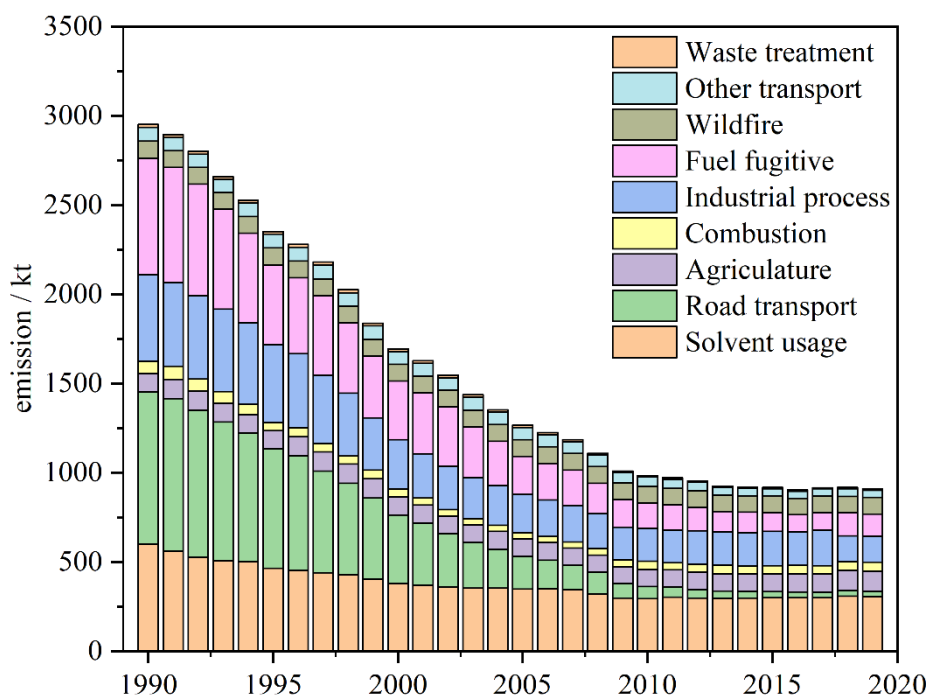

**Figure S4.** Emissions of VOCs from anthropogenic sources in the UK between 1990-2019. Data: UK National Atmospheric Emissions Inventory (<https://naei.beis.gov.uk/>, last access 07 September 2023).

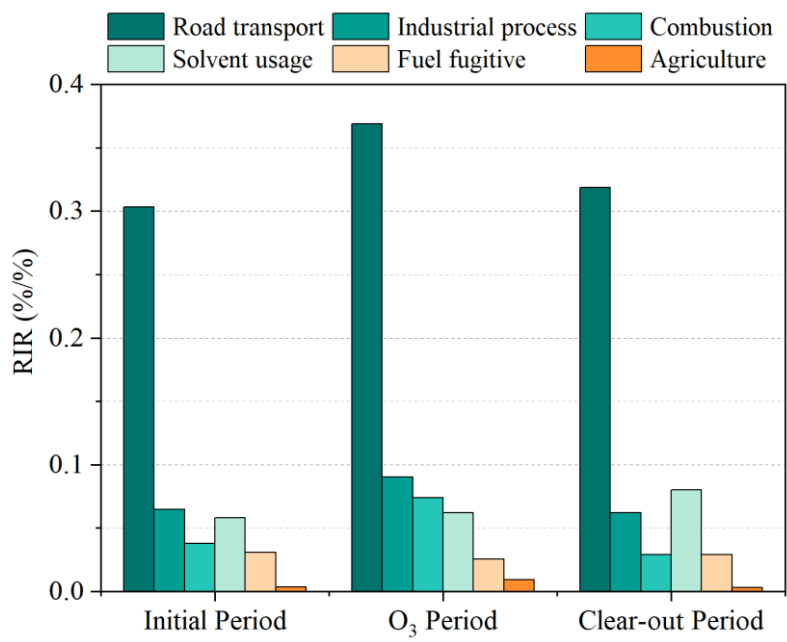

**Figure S5.** Modelled RIRs for anthropogenic sources in selected periods during 08:00-16:00 LST.
