# Supplementary material for: The impact multi-decadal of changes in VOCs speciation on urban ozone chemistry: A case study in Birmingham, United Kingdom
Source: Copernicus journal article supplement (doi:10.5194/egusphere-2023-2294), 2023-10-19
Supplement: Supplementary file [file egusphere-2023-2294-AC2-supplement.pdf]

## Reviewer #2

The manuscript entitled "The impact multi-decadal of changes in VOCs speciation on urban ozone chemistry: A case study in Birmingham, United Kingdom" aimed to quantify the impacts of the real-world changes in VOCs sources on urban O<sub>3</sub> production rate, and also evaluate the relative importance of different VOCs functional group classes on the O<sub>3</sub> production. The manuscript provides some valuable advice for the pollution control of O<sub>3</sub> in the area with relative clean air quality. I therefore suggest a necessary revision of this manuscript before final publication in Atmospheric Chemistry and Physics.

**Authors' reply:** We appreciate the reviewer's efforts in recognizing the contribution of our results to the research field of urban ozone pollution. We have been able to incorporate changes in responding to the reviewer's valuable feedbacks. Revised texts within the manuscript have been marked by red color, and newly added Table/Figure captions have been highlighted by yellow.

Here is a point-by-point response to the reviewer's comments.

- 1) The innovation of the paper needs further unearthing, as there are already many similar literatures;

**Authors' reply:** We value the reviewer's efforts in comparing our study to those in the existing literatures. Throughout the revised Introduction, we have enriched literature reviews (**Page 3, Line 60-62, Line 81-85** in revised manuscript) on previous O<sub>3</sub> studies. The current research gap has been clearly stated (**Page 3-4, Line 88-92** in revised manuscript), and the significance of our results has been pointed out (**Page 4, Line 102-104** in revised manuscript). The innovation of this paper is briefly denoted as follows:

- Over the last decades, there have been extensive studies investigating controlling factors of *in-situ* production of O<sub>3</sub> from the perspective of chemical control regime and reactivity of O<sub>3</sub> precursors (please see detailed literature review on **Page 2-3 Line 47-63** in revised manuscript). For example, a recent study in a coastal city of China applied observation-constrained box model to clarify sensitivity of O<sub>3</sub> production and OH reactivity of VOCs classes during a high O<sub>3</sub> event in 2019 autumn. The results indicated that the O<sub>3</sub> production at

the urban site was VOC-sensitive. Aromatics, alkenes, and alkanes were the primary reduction target for the ozone pollution control, which showed the highest OH reactivity and played a leading role in radical recycling and O<sub>3</sub> production (Liu et al., 2022).

Since VOC emissions are often the limiting factor in photochemical production of urban ozone, the issue of shifts in major VOC emissions (detailed discussion please see **Page 3 Line 64-88** in revised manuscript) and their resulting impacts on urban ozone chemistry have been addressed worldwide. The increasing role for volatile chemical product (VCP) emissions in urban ozone chemistry has been taken into account. In North America and Europe cities, OVOCs emitted from volatile chemical products (VCP) can outweigh fossil fuel sources for urban VOCs. Modelling results showed that the additional OVOCs from VCP emissions were the most important species for urban O<sub>3</sub> production, increasing the daily maximum O<sub>3</sub> mixing ratio by as much as 10 ppbv in Los Angeles and 11 ppbv in New York (Coggon et al., 2021; Qin et al., 2021).

Although investigations on *in-situ* urban ozone chemistry and attributions of O<sub>3</sub> production from important VOC sources have been extensively conducted in atmospheric modeling studies, there has been limited reporting on the evaluation of real-world emission changes in VOCs speciation. From the perspective of *in-situ* O<sub>3</sub> production, the benefit of substantial reductions on vehicle emissions, whilst there has been a parallel increasing role for non-industrial solvent usage remains unclear. What effect this shift in speciation is having on ozone chemistry is less well studied. Therefore, by incorporating the detailed NAEI VOCs emission inventories over the period of 1990-2019 into a box model, O<sub>3</sub> formation in Birmingham is used as a case study to quantify the impacts of the real-world changes in VOCs sources on urban O<sub>3</sub> production rate. The study makes a major advance since it couples both highly detailed *in-situ* measurements along with a multi-year highly speciated inventory, something that has not been available to other studies. The results help understand impacts of decades of abating different VOCs-emitting sectors on urban O<sub>3</sub> production, and outline the implications for future O<sub>3</sub> control strategies.

## References

Coggon, M. M., Gkatzelis, G. I., McDonald, B. C., Gilman, J. B., Schwantes, R. H., Abuhassan, N.,

Aikin, K. C., Arend, M. F., Berkoff, T. A., Brown, S. S., Campos, T. L., Dickerson, R. R., Gronoff, G., Hurley, J. F., Isaacman-VanWertz, G., Koss, A. R., Li, M., McKeen, S. A., Moshary, F., Peischl, J., Pospisilova, V., Ren, X., Wilson, A., Wu, Y., Trainer, M., and Warneke, C.: Volatile chemical product emissions enhance ozone and modulate urban chemistry, *Proc Natl Acad Sci U S A*, 118, 10.1073/pnas.2026653118, 2021.

Liu, T., Hong, Y., Li, M., Xu, L., Chen, J., Bian, Y., Yang, C., Dan, Y., Zhang, Y., and Xue, L.: Atmospheric oxidation capacity and ozone pollution mechanism in a coastal city of southeastern China: analysis of a typical photochemical episode by an observation-based model, *Atmospheric Chemistry and Physics*, 22, 2173-2190, 10.5194/acp-22-2173-2022, 2022.

Qin, M., Murphy, B. N., Isaacs, K. K., McDonald, B. C., Lu, Q., McKeen, S. A., Koval, L., Robinson, A. L., Efstathiou, C., and Allen, C.: Criteria pollutant impacts of volatile chemical products informed by near-field modelling, *Nature sustainability*, 4, 129-137, 10.1038/s41893-020-00614-1, 2021.

- 2) In this study only 38 VOCs species were detected, which was much less than the photochemical species requirements of PAMS and also not conducive to the operation of the OBM model. It is also necessary for the author to explain the quality control of the online VOCs monitoring instrument;

**Authors' reply:**

- Thank you for your comment. The up-to-dated 2017 PAMS target list includes 27 priority compounds and 37 optional compounds ([Additional Revisions to the PAMS Compound Target List](#), last accessed 2024-Jan-30). We agree with you that the measured 38 VOCs species at Birmingham Supersite was much less than the PAMS requirements. Nevertheless, the measured species in this study covered 20 of the 27 priority compounds. Mixing ratios of alkanes, alkenes, aromatics, and oxygenated VOCs species with high OH reactivities were well-recorded at the sampling site. In terms of the model performance, the mixing ratios of modelled O<sub>3</sub> during the initial period, O<sub>3</sub> period, and clear-out period were significantly correlated with those of the observed O<sub>3</sub> ( $R^2 = 0.9$  at all periods,  $P < 0.05$ ).

From the perspective of O<sub>3</sub> formation mechanism, *in-situ* production of O<sub>3</sub> is driven by radical

chemistry. Therefore, even a simplified NO<sub>x</sub>-O<sub>3</sub>-VOC mechanism with limited numbers of VOCs input can describe the most important features of chemical formation of O<sub>3</sub> (Seinfeld and Pandis, 2016). For example, a recent study applied a box model constrained by NO<sub>x</sub> and a single compound, propane, to evaluate the chemical regime of urban O<sub>3</sub> in major cities in China, Japan, and the United States (Wolf et al., 2022). It was concluded that the elevated O<sub>3</sub> in Chinese cities and the slowed reduction of O<sub>3</sub> in Japan and US were likely attributed to decreased NO<sub>x</sub> emissions.

- Regarding your comments on the quality control of the online VOCs monitoring instrument, This was completed regularly since the instrument is used for long-term monitoring and reports to national air quality networks. Direct calibration using 4 ppbv gas standard cylinders and the use of carbon response for this instrument was tightly controlled, with regular carbon-wise responses calculated for all species as a cross check. Calibration sequences of the 4 ppbv calibration used in this study are run at regular intervals, with responses analyzed as a function of time. FID response has been verified to be stable over the lifetime of the GC-FID instrument, and did not drift in any observable way over the sample analyzing period for this study. Detection limits for this instrument are not higher than 0.1 ppbv and are typically in the 5-10 pptv range. We have added **Table 1** and **Table 2** into the supplement material. **Table 1** lists which species were directly calibrated, and which used equivalent carbon numbers for quantification. **Table 2** lists effective carbon numbers of species which used carbon-wise responses. Additionally, Descriptions on GC-FID instrument has been fully revised, and the calibration sequence has been added in the revised manuscript onto **Page 6, Line 151-156**.

**Table 1.** Species quantified and their corresponding quantification method used in this study.

| <b>Species</b>          | <b>Quantification method</b>                       |
|-------------------------|----------------------------------------------------|
| ethane                  | 4 ppbv gas standard cylinders                      |
| propane                 | 4 ppbv gas standard cylinders                      |
| i-butane                | 4 ppbv gas standard cylinders                      |
| n-butane                | 4 ppbv gas standard cylinders                      |
| i-pentane               | 4 ppbv gas standard cylinders                      |
| n-pentane               | 4 ppbv gas standard cylinders                      |
| 2-methylpentane         | 4 ppbv gas standard cylinders                      |
| hexane                  | 4 ppbv gas standard cylinders                      |
| heptane                 | 4 ppbv gas standard cylinders                      |
| i-octane                | 4 ppbv gas standard cylinders                      |
| ethene                  | 4 ppbv gas standard cylinders                      |
| propene                 | 4 ppbv gas standard cylinders                      |
| t-2-butene              | 4 ppbv gas standard cylinders                      |
| 1-butene                | 4 ppbv gas standard cylinders                      |
| c-2-butene              | 4 ppbv gas standard cylinders                      |
| 1,3-butadiene           | 4 ppbv gas standard cylinders                      |
| t-2-pentene             | 4 ppbv gas standard cylinders                      |
| c-2-pentene             | 4 ppbv gas standard cylinders                      |
| isoprene                | 4 ppbv gas standard cylinders                      |
| acetylene               | 4 ppbv gas standard cylinders                      |
| benzene                 | 4 ppbv gas standard cylinders                      |
| toluene                 | 4 ppbv gas standard cylinders                      |
| ethylbenzene            | 4 ppbv gas standard cylinders                      |
| m-xylene                | 4 ppbv gas standard cylinders                      |
| p-xylene                | 4 ppbv gas standard cylinders                      |
| o-xylene                | 4 ppbv gas standard cylinders                      |
| 1,3,5-trimethoxybenzene | 4 ppbv gas standard cylinders                      |
| 1,2,4-trimethoxybenzene | 4 ppbv gas standard cylinders                      |
| 1,2,3-trimethoxybenzene | 4 ppbv gas standard cylinders                      |
| cyclopentane            | effective carbon number using toluene as reference |
| 3-methylpentane         | effective carbon number using toluene as reference |
| nonane                  | effective carbon number using toluene as reference |
| i-butene                | effective carbon number using toluene as reference |
| acetaldehyde            | effective carbon number using toluene as reference |
| acetone                 | effective carbon number using toluene as reference |
| methanol                | effective carbon number using toluene as reference |
| ethanol                 | effective carbon number using toluene as reference |

**Table 2.** Average concentration in ppbv and effective carbon number (ECN) of the measured VOCs at Birmingham Supersite over August, 2022.

|                  | <b>Species</b>          | <b>Mean</b>  | <b>SD</b> | <b>ECN</b> |      |
|------------------|-------------------------|--------------|-----------|------------|------|
| <b>Alkanes</b>   | ethane                  | 1.69         | 1.48      | –          |      |
|                  | propane                 | 0.65         | 0.57      | –          |      |
|                  | i-butane                | 0.27         | 0.27      | –          |      |
|                  | n-butane                | 0.50         | 0.46      | –          |      |
|                  | cyclopentane            | 0.03         | 0.04      | 5.00       |      |
|                  | i-pentane               | 0.19         | 0.17      | –          |      |
|                  | n-pentane               | 0.09         | 0.10      | –          |      |
|                  | 2-methylpentane         | 0.05         | 0.05      | –          |      |
|                  | 3-methylpentane         | 0.03         | 0.03      | 5.00       |      |
|                  | hexane                  | 0.03         | 0.03      | –          |      |
|                  | heptane                 | 0.02         | 0.02      | –          |      |
|                  | i-octane                | 0.02         | 0.02      | –          |      |
|                  | nonane                  | 0.06         | 0.03      | 9.00       |      |
| <b>Alkenes</b>   | ethene                  | 0.26         | 0.20      | –          |      |
|                  | propene                 | 0.10         | 0.08      | –          |      |
|                  | t-2-butene              | 0.01         | 0.01      | –          |      |
|                  | 1-butene                | 0.02         | 0.02      | –          |      |
|                  | i-butene                | 0.02         | 0.01      | 4.00       |      |
|                  | c-2-butene              | 0.00         | 0.00      | –          |      |
|                  | 1,3-butadiene           | 0.01         | 0.01      | –          |      |
|                  | t-2-pentene             | 0.00         | 0.01      | –          |      |
|                  | c-2-pentene             | 0.01         | 0.01      | –          |      |
|                  | isoprene                | 0.12         | 0.13      | –          |      |
| <b>Alkyne</b>    | acetylene               | 0.11         | 0.06      | –          |      |
| <b>Aromatics</b> | benzene                 | 0.07         | 0.05      | –          |      |
|                  | toluene                 | 0.16         | 0.14      | –          |      |
|                  | ethylbenzene            | 0.04         | 0.04      | –          |      |
|                  | m-xylene                | 0.11         | 0.12      | –          |      |
|                  | p-xylene                | 0.04         | 0.04      | –          |      |
|                  | o-xylene                | 0.04         | 0.05      | –          |      |
|                  | 1,3,5-trimethoxybenzene | 0.01         | 0.01      | –          |      |
|                  | 1,2,4-trimethoxybenzene | 0.05         | 0.06      | –          |      |
|                  | 1,2,3-trimethoxybenzene | 0.01         | 0.02      | –          |      |
|                  | <b>OVOCs</b>            | acetaldehyde | 1.09      | 0.59       | 1.00 |
|                  |                         | acetone      | 2.21      | 1.13       | 2.00 |
| methanol         |                         | 3.72         | 2.35      | 0.75       |      |
| ethanol          |                         | 1.79         | 1.60      | 1.50       |      |

## References

Seinfeld, J. H. and Pandis, S. N.: Atmospheric chemistry and physics: from air pollution to climate change, John Wiley & Sons, 2016.

Wolf, M. J., Esty, D. C., Kim, H., Bell, M. L., Brigham, S., Nortonsmith, Q., Zaharieva, S., Wendling, Z. A., de Sherbinin, A., and Emerson, J. W.: New insights for tracking global and local trends in exposure to air pollutants, *Environmental Science & Technology*, 56, 3984-3996, 10.1021/acs.est.1c08080, 2022.

3) Is the research based on case study representative in evaluating photochemical pollution in a certain region?

**Authors' reply:** Thank you for pointing this out. The Birmingham Supersite has been operated for many years and represents a typical UK urban background environment (Please see detailed description on surroundings of the site in revised manuscript **Page 4 Line 108-112**). As a case study in Birmingham, we evaluated the impacts of changes in VOC sources and speciation on the O<sub>3</sub> production. The evaluation is based on the national trend of VOC emissions that hold for Birmingham where on-road emissions, residential combustion, gas leakage, and non-industrial solvent usage are dominant sources for O<sub>3</sub> precursors. However, the results we obtained in this study may not hold for cities near large industrial VOC sources (i.e., oil and natural gas production (Edwards et al., 2014); steel and cement production (Yao et al., 2021)) can significantly affect composition and chemical reactivity of ambient VOCs. So whilst no location can every truly be considered as 'typical', this site is one that has been used for many years as being representative for a city with a mix of residential, business, energy and road traffic emission sources, and in turn is therefore very similar in nature to many other UK cities.

■ In responding to your comment, we have added “**The attribution of VOCs sources based on the NAEI data can be thought of as representative for this case study as a typical urban environment, but it might not hold for cities near large industrial VOC sources (i.e., oil refinery and industrial production sites), since they can significantly affect composition and chemical reactivity of ambient VOCs.**” in the revised manuscript **Page 15 Line 379-383**.

## References

- Edwards, P. M., Brown, S. S., Roberts, J. M., Ahmadov, R., Banta, R. M., deGouw, J. A., Dube, W. P., Field, R. A., Flynn, J. H., Gilman, J. B., Graus, M., Helmig, D., Koss, A., Langford, A. O., Lefer, B. L., Lerner, B. M., Li, R., Li, S. M., McKeen, S. A., Murphy, S. M., Parrish, D. D., Senff, C. J., Soltis, J., Stutz, J., Sweeney, C., Thompson, C. R., Trainer, M. K., Tsai, C., Veres, P. R., Washenfelder, R. A., Warneke, C., Wild, R. J., Young, C. J., Yuan, B., and Zamora, R.: High winter ozone pollution from carbonyl photolysis in an oil and gas basin, *Nature*, 514, 351-354, 10.1038/nature13767, 2014.
- Yao, S., Wang, Q., Zhang, J., Zhang, R., Gao, Y., Zhang, H., Li, J., and Zhou, Z.: Ambient volatile organic compounds in a heavy industrial city: Concentration, ozone formation potential, sources, and health risk assessment, *Atmospheric Pollution Research*, 12, 101053, 10.1016/j.apr.2021.101053, 2021

- 4) The research result showed that road transport played the most important VOC role in the case study ozone photochemistry despite it only contributing 3.3% of national VOCs emissions in 2019. Since the proportion of emissions from road transportation is so limited, how to further control?

**Authors' reply:** In support of Net Zero proposed by International Energy Agency, UK and many countries in the world delivered plans to promote electric-fuel hybrid and full-electric vehicles. UK government announced a commitment to phasing-out sales of new internal combustion engine vehicles by 2030. The target is set by 2035 in European countries. Government of China has been implementing policies on reduction/exemption of tax, as well as subsidies on buying full-electric vehicles since 2012 (Wang et al., 2017). The widespread policy will over time lead to significant VOCs reductions from on-road transportation and related fuel (i.e., gasoline, natural gas, and liquefied petroleum gas (LPG)) usages.

We believe that this question is already well answered through Figures 5 and 6 and the Conclusion section (detailed discussion please see revised manuscript **Page 15-18**). In combination these demonstrate that further reducing road transport emissions, ultimately to 100% abatement, does continue to deliver further reductions in P(O<sub>3</sub>). Once 100% abated, however, the remaining



VOC sources such as solvents control P(O<sub>3</sub>) rates.

### **References**

Wang, N., Pan, H., and Zheng, W.: Assessment of the incentives on electric vehicle promotion in China, *Transportation Research Part A: Policy and Practice*, 101, 177-189, 10.1016/j.tra.2017.04.037, 2017.
